# Supplementary material for: Distinct sets of PIWI proteins produce arbovirus and transposon-derived piRNAs in Aedes aegypti mosquito cells
Source: PubMed Central journal article supplement (PMC4513867; doi:10.1093/nar/gkv590), 2015-06-11
Supplement: supp_gkv590_nar-00950-a-2015-File008.pdf [file supp_gkv590_nar-00950-a-2015-File008.pdf]

# Supplementary Data

For

## **Distinct sets of PIWI proteins produce arbovirus and transposon-derived piRNAs in *Aedes aegypti* mosquito cells.**

Pascal Miesen<sup>1</sup>, Erika Girardi<sup>1</sup>, Ronald P. van Rij<sup>1\*</sup>

<sup>1</sup>Department of Medical Microbiology, Radboud University Medical Centre, Radboud Institute for Molecular Life Sciences, P.O. Box 9101, 6500 HB Nijmegen, The Netherlands

\*To whom correspondence should be addressed.

Tel: +31 24 3617574;

Mail: ronald.vanrij@radboudumc.nl

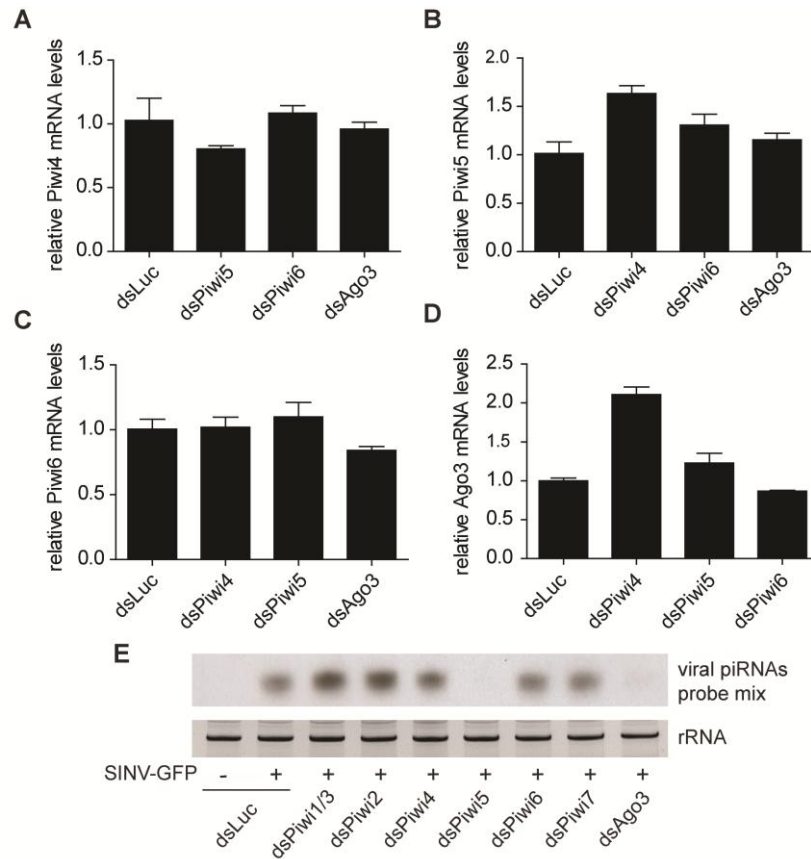

**Figure S1: Specificity of PIWI knockdown** (A-D) qPCR for Piwi4, Piwi5, Piwi6 and Ago3 transcripts, respectively, in Aag2 cells transfected with the indicated dsRNA. mRNA levels were normalized to the dsLuc control knockdown; bars represent the mean  $\pm$  SEM of three independent experiments. (E) Small RNA northern blot for SINV piRNAs in Aag2 cells transfected with the indicated dsRNA. A pool of four probes (individual probes shown in Figure 1A) was used to detect vpiRNAs. The rRNA loading control is identical to the one shown in Figure 2C, since the same membrane was subsequently hybridized to the individual 8040 (+) probe and the vpiRNA probe mix after harsh stripping.

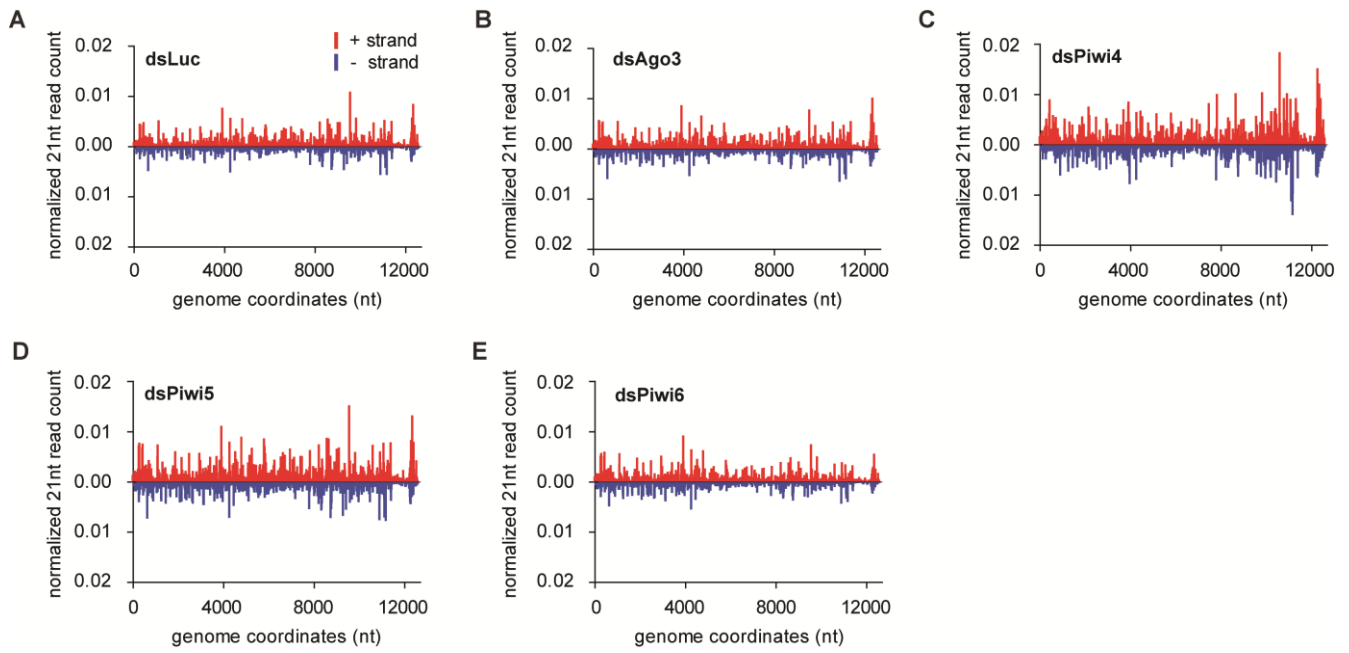

**Figure S2: Levels of vsRNAs remain stable upon PIWI knockdown (A-E)** Genome distribution of 21 nt vsRNAs across the (+) strand (red) or (-) strand (blue) of the SINV genome. The average counts (n=3) of the 5' ends of the small RNA reads at each nucleotide position are shown. The read number was normalized to the corresponding library size. The low read counts around position 12,000 coincides with the position of the GFP transgene, which is occasionally lost from the recombinant virus genome during virus replication.

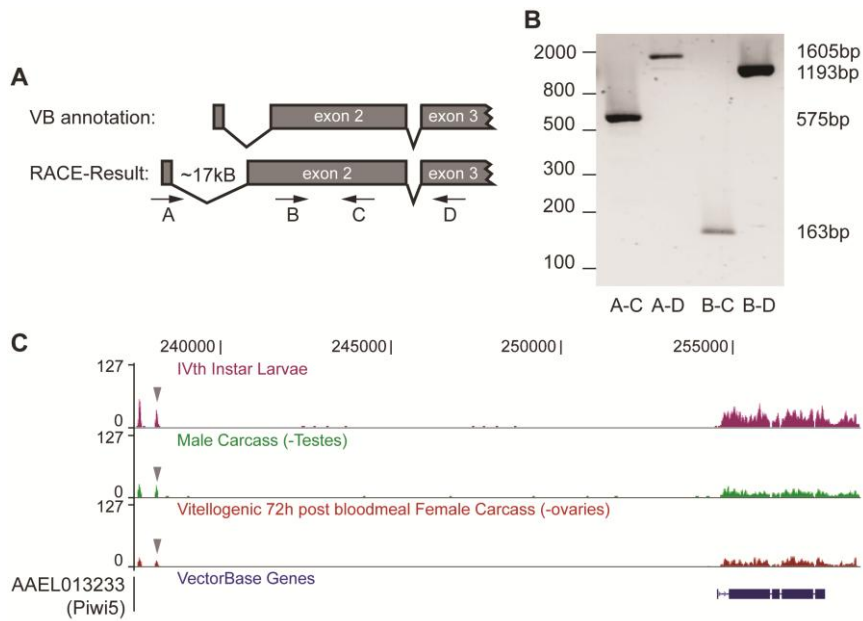

**Figure S3: Revised gene annotation of Piwi5.** (A) Schematic representation of the currently annotated gene topology of Piwi5 exon 1 to exon 3 published in Vectorbase (VB; release April 2015) and the revised gene structure as determined by 5' RACE on RNA isolated from Aag2 cells (exons and introns are not drawn to scale). The entire first annotated exon is not included in the Piwi5 mRNA. Instead, a previously un-annotated 108nt exon was found approximately 17 kB upstream of exon 2. Furthermore, the second exon includes 223 additional nucleotides at its 5' end. (B) Reverse-transcriptase PCR on RNA prepared from Aag2 cells. The positions of the primers are indicated by the arrows in panel A. A size marker is indicated on the left-hand side of the gel picture. Numbers on the right indicate the expected size of the PCR products. (C) Genome browser shots from *Aedes aegypti* supercontig 1.809 ([www.vector.caltech.edu/](http://www.vector.caltech.edu/)). Numbers on top indicate the nucleotide position of the genomic scaffold. RNA sequencing data from the indicated tissue/developmental stage, as well as the annotated Piwi5 gene topology from Vectorbase are shown. The gray arrowheads indicate a putative, additional exon that we did not detect in our RACE analyses and subsequent cloning experiments.

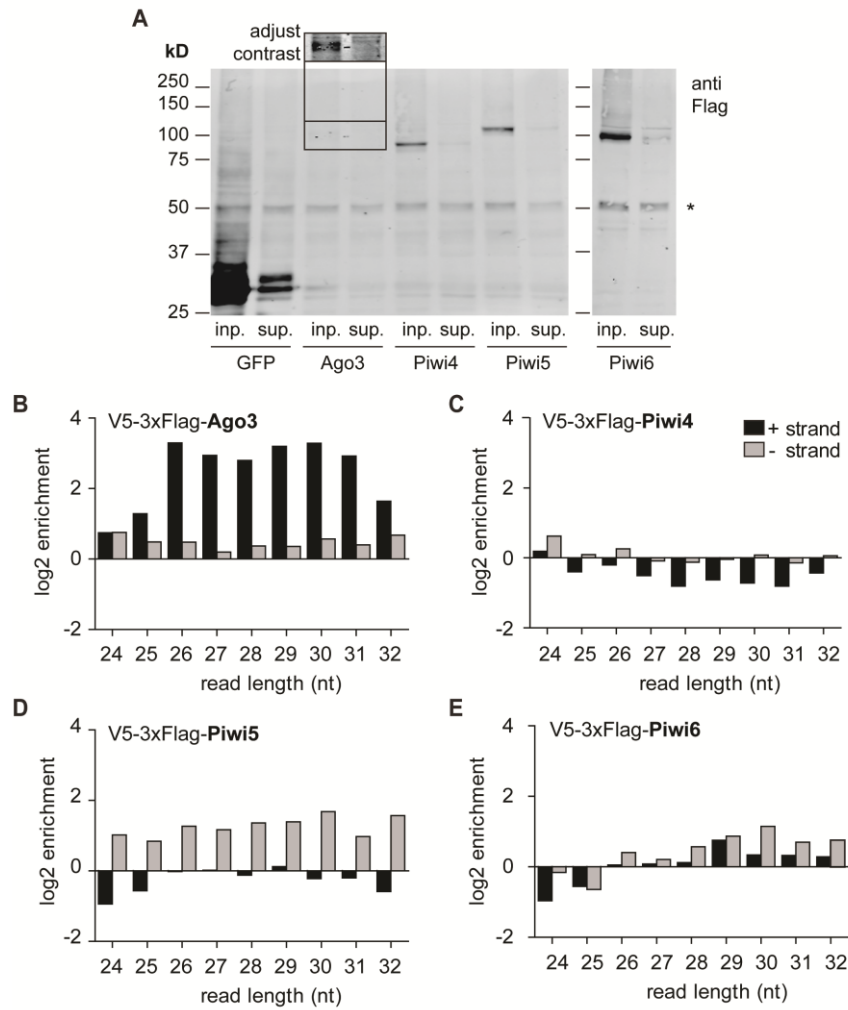

**Figure S4: Fold enrichment of vpiRNAs in PIWI IPs.** (A) Anti-Flag western blot for V5-3xFlag tagged PIWI proteins (size range 104kD-112kD) or V5-3xFlag-GFP (32.5kD). Protein expression is analyzed in 5% of the input (inp.) samples before V5-IP and 5% of the supernatant (sup.) after IP. \* indicates a non-specific protein band. Linear contrast adjustment was used in Adobe Photoshop to enhance the signal for V5-3xFlag-Ago3, which was only lowly expressed. (B-E) Enrichment of small RNA reads in the V5-IPs for the indicated PIWI proteins over the control IP (V5-3xFlag-GFP IP). Log<sub>2</sub>-transformed enrichment scores of reads that map the SINV (+) strand and (-) strand are indicated in black and gray, respectively.

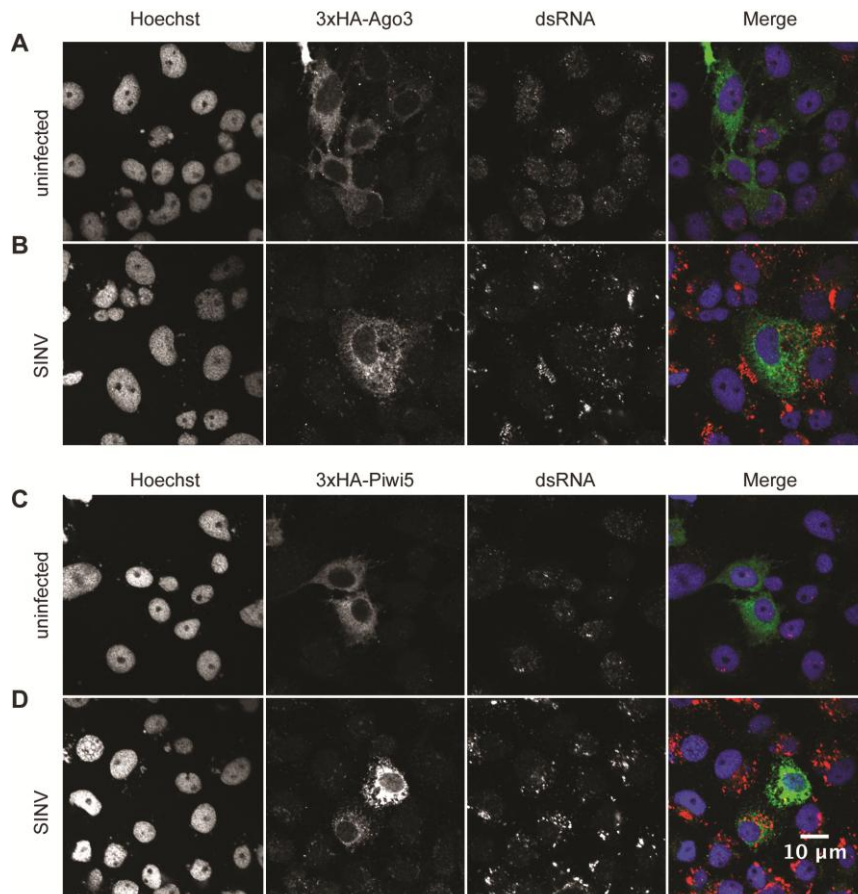

**Figure S5: Ago3 and Piwi5 sub-cellular localization.** Additional images of the experiment shown in Figure 5. The localization of 3xHA-tagged Ago3 (A,B) or Piwi5 (C,D) in uninfected (A,C) or SINV (parental virus) infected (B,D) Aag2 cells was determined by confocal immunofluorescence analysis. Hoechst staining was used to stain the nuclei. Intracellular dsRNA staining was used to identify infected cells as described in the legend to Figure 5. Scale bar indicates 10μm.

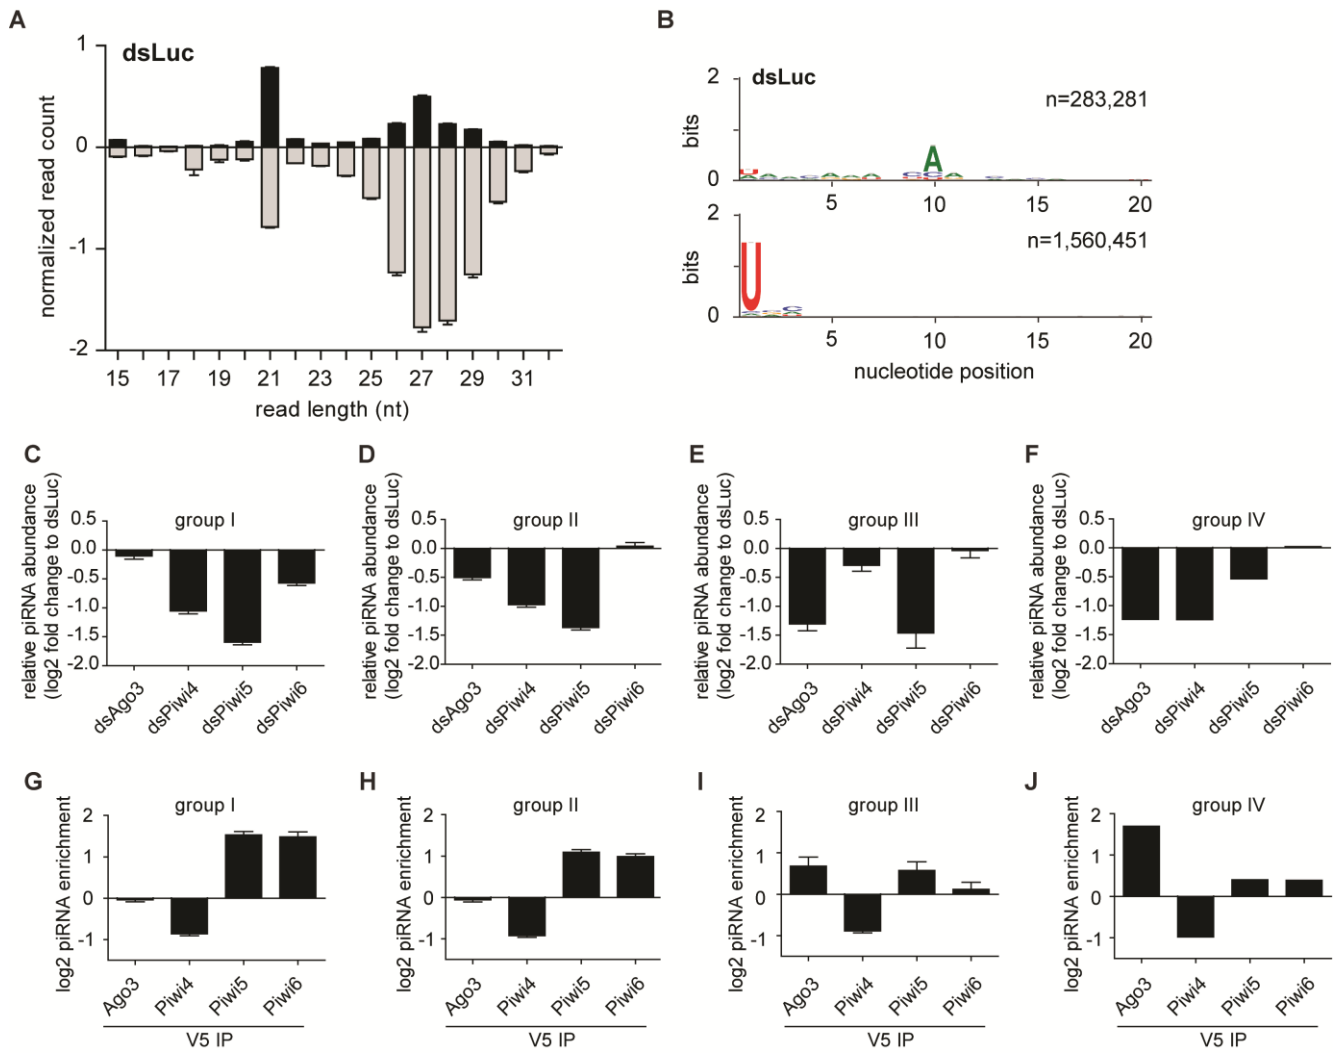

**Figure S6: Groups of transposons can be classified based on their dependence on different PIWI proteins for piRNA biogenesis.** (A) Size profile of small RNA reads from the dsLuc libraries that map to the collection of *Aedes aegypti* TE sequences published in the TEfam transposon database. Read counts were normalized to the corresponding library sizes. The average and SEM of the three independent libraries are shown. (B) Nucleotide bias at each position in the 25-30nt small RNA reads from the dsLuc libraries that map to the SINV (+) strand (upper panel) and (-) strand (lower panel). All reads of the three independent libraries were combined to generate the sequence logo; n, number of reads. (C-F) Relative abundance of 25-30nt reads in the indicated knockdown libraries compared to the dsLuc control libraries for group I (C), group II (D), group III (E) and group IV (F) transposons. (G-J) Enrichment of 25-30nt reads in the indicated IPs over the GFP control IP (for group I (G), group II (H), group III (I) and group IV (J) transposons). Panels C-J represent the mean of all transposons belonging to the corresponding group; error bars indicate the SEM. For a definition of group I to IV transposons, please consult Figure 6.

**Table S1: Basic characteristics of the small RNA deep sequencing libraries.**

For each category the number of reads is indicated. The numbers in brackets indicate the percentage of the total library size.

| Library name               | Total Library Size | SINV-GFP mappers | SINV-GFP mappers (25-30nt) | TEfam mappers     | TEfam mappers (25-30nt) |
|----------------------------|--------------------|------------------|----------------------------|-------------------|-------------------------|
| <i>Knockdown libraries</i> |                    |                  |                            |                   |                         |
| <b>dsLuc-1</b>             | 8,037,253          | 411,612 (5.1%)   | 62,296 (0.8%)              | 913,974 (11.4%)   | 638,343 (7.9%)          |
| <b>dsLuc-2</b>             | 8,250,209          | 442,710 (5.4%)   | 60,718 (0.7%)              | 995,007 (12.1%)   | 687,766 (8.3%)          |
| <b>dsLuc-3</b>             | 6,071,409          | 229,474 (3.8%)   | 43,138 (0.7%)              | 729,563 (12.0%)   | 517,623 (8.5%)          |
| <b>dsAgo3-1</b>            | 7,068,908          | 394,776 (5.6%)   | 12,497 (0.2%)              | 669,293 (9.5%)    | 403,034 (5.7%)          |
| <b>dsAgo3-2</b>            | 7,904,410          | 437,717 (5.5%)   | 13,786 (0.2%)              | 767,388 (9.7%)    | 463,596 (5.8%)          |
| <b>dsAgo3-3</b>            | 4,330,827          | 173,706 (4.0%)   | 11,894 (0.3%)              | 450,046 (10.4%)   | 283,516 (6.5%)          |
| <b>dsPiwi4-1</b>           | 7,015,754          | 581,753 (8.3%)   | 44,936 (0.6%)              | 755,696 (10.8%)   | 366,409 (5.2%)          |
| <b>dsPiwi4-2</b>           | 5,380,559          | 522,716 (9.7%)   | 30,809 (0.6%)              | 588,755 (10.9%)   | 248,328 (4.6%)          |
| <b>dsPiwi4-3</b>           | 7,935,701          | 607,975 (7.7%)   | 32,163 (0.4%)              | 898,310 (11.3%)   | 423,123 (5.3%)          |
| <b>dsPiwi5-1</b>           | 6,544,842          | 498,693 (7.6%)   | 9,524 (0.1%)               | 498,407 (7.6%)    | 206,713 (3.2%)          |
| <b>dsPiwi5-2</b>           | 8,641,706          | 649,885 (7.5%)   | 12,565 (0.1%)              | 687,957 (8.0%)    | 301,385 (3.5%)          |
| <b>dsPiwi5-3</b>           | 5,886,880          | 341,206 (5.8%)   | 10,838 (0.2%)              | 496,328 (8.4%)    | 245,686 (4.2%)          |
| <b>dsPiwi6-1</b>           | 6,825,076          | 425,580 (6.2%)   | 43,645 (0.6%)              | 858,151 (12.6%)   | 586,311 (8.6%)          |
| <b>dsPiwi6-2</b>           | 8,139,535          | 521,903 (6.4%)   | 41,781 (0.5%)              | 1,036,124 (12.7%) | 688,963 (8.5%)          |
| <b>dsPiwi6-3</b>           | 7,222,447          | 317,259 (4.3%)   | 51,061 (0.7%)              | 988,822 (13.7%)   | 682,842 (9.5%)          |
| <i>IP libraries</i>        |                    |                  |                            |                   |                         |
| <b>GFP</b>                 | 1,374,646          | 19,542 (1.4%)    | 5,641 (0.4%)               | 137,252 (10.0%)   | 63,755 (4.6%)           |
| <b>Ago3</b>                | 2,525,542          | 103,906 (4.1%)   | 74,696 (3.0%)              | 219,556 (8.7%)    | 138,592 (5.5%)          |
| <b>Piwi4</b>               | 3,443,700          | 49,602 (1.4%)    | 9,828 (0.3%)               | 182,848 (5.3%)    | 83,766 (2.4%)           |
| <b>Piwi5</b>               | 3,113,402          | 30,158 (1.0%)    | 14,803 (0.5%)              | 401,394 (12.9%)   | 310,650 (10.0%)         |
| <b>Piwi6</b>               | 2,857,742          | 34,396 (1.2%)    | 14,760 (0.5%)              | 344,484 (12.1%)   | 263,350 (9.2%)          |



## SUPPLEMENTARY MATERIALS AND METHODS

### Cells and viruses

Aag2 cells were cultured at 25°C in Leibovitz's L-15 medium (Invitrogen) supplemented with 10% heat inactivated Fetal calf serum (PAA), 2% Tryptose Phosphate Broth Solution (Sigma), 1x MEM Non-Essential Amino Acids (Invitrogen) and 50 U/ml penicillin and 50 µg/ml streptomycin (Invitrogen). U4.4 and C6/36 cells were cultured in the same medium at 28°C. BHK-21 cells were cultured at 37°C, 5% CO<sub>2</sub> in Dulbecco's modified Eagles Medium (DMEM) supplemented with 10% FCS and 50 U/ml penicillin and 50 µg/ml streptomycin. The virus used throughout this study, with the exception of Figure 1C, 5A-5D and S5, is a recombinant, double-subgenomic Sindbis virus expressing GFP from the second subgenomic promoter (pTE-3'2J-GFP). For Figure 1C, 5A-5D and S5, the parental virus was used (pTE-3'2J). Viruses were produced in BHK-21 cells as previously described (1). Unless stated differently, Aag2 cells were infected with SINV at a multiplicity of infection (MOI) of 1 for 48h hours.

### Generation of plasmids and dsRNA production

Insect expression vectors, based on pAc5.1 (Invitrogen), were constructed for N-terminal tagging of proteins with V5-3xFlag or 3xHA tags. The full-length coding sequence of Piwi4, Piwi5, Piwi6 and Ago3 was amplified from Aag2 complementary DNA (cDNA) and cloned downstream of the tag sequences.

For dsRNA production, *in vitro* transcription using T7 RNA polymerase was performed on T7-promoter-flanked PCR products. To allow the formation of double-stranded RNA, the reaction products were heated to 80°C and then gradually cooled to room temperature. Subsequently, the RNA was purified using the GenElute Mammalian Total RNA Miniprep Kit (Sigma) following the manufacturer's instructions. Primers used for plasmid or dsRNA production were:

|              |                                             |
|--------------|---------------------------------------------|
| XbaI-Piwi4   | cagtctagaATGTCTGACCGTTACTCTC                |
| NotI-Piwi4   | catgcgccgcTTACAAGAAGTACAGCTTC               |
| XbaI-Piwi5   | cagtctagaATGGCGGATAGACAGCAAG                |
| NotI-Piwi5   | catgcgccgcTTACAGATAATAGAGTTTC               |
| XbaI-Piwi6   | cagtctagaATGGCTGATAATCCACAGG                |
| NotI-Piwi6   | catgcgccgcCTACAAAAAGTAAAGTTTC               |
| XbaI-Ago3    | cagtctagaATGTCCTCGCGGTTGAATTTAG             |
| NotI-Ago3    | catgcgccgcTCACAGGTAGAACAGTTT                |
| T7Fw-Piwi1/3 | taatacgactcactataggagaCCACGCCATCGTTTCAA     |
| T7Re-Piwi1/3 | taatacgactcactataggagaCCTCAGTTTGTTCACCATA   |
| T7Fw-Piwi2   | taatacgactcactataggagaCCGTCCTACTTCCAGCAC    |
| T7Re-Piwi2   | taatacgactcactataggagaGCGGCACTCCAGGGACAAT   |
| T7Fw-Piwi4   | taatacgactcactataggagaCGTGGAAGTCCTTCTTCTCG  |
| T7Re-Piwi4   | taatacgactcactataggagaTGTCAGTTGATCGCTTCTCAA |
| T7Fw-Piwi5   | taatacgactcactataggagaGCCATACATCGGGTCAAAAT  |
| T7Re-Piwi5   | taatacgactcactataggagaCTCTCCACCGAAGGATTGAA  |
| T7Fw-Piwi6   | taatacgactcactataggagaCAACGGAGGATCTTCACGAG  |
| T7Re-Piwi6   | taatacgactcactataggagaAATCGATGGCTTGATTTGGA  |
| T7Fw-Piwi7   | taatacgactcactataggagaGTGGAGGTCGTGGAGGTAAC  |
| T7Re-Piwi7   | taatacgactcactataggagaGTTTGCGGTGTTTCCGFACT  |
| T7Fw-Ago3    | taatacgactcactataggagaTGCTTACTCGTGTTCGCGTAG |
| T7Re-Ago3    | taatacgactcactataggagaGGCATGGCAGATCCAATACT  |
| T7Fw-Ago2    | taatacgactcactataggagaCTACGAGCAGGAGGTCAAGG  |
| T7Re-Ago2    | taatacgactcactataggagaTCCATGCCTTTGAGGAAATC  |
| T7Fw-Ago1    | taatacgactcactataggagaCCGGTCATCGAGTTCATGT   |

|           |                                              |
|-----------|----------------------------------------------|
| T7Re-Ago1 | taatacgcactactataggagaCGTGGCTTTGATCATGGTT    |
| T7Fw-Luc  | taatacgcactactataggagaTATGAAGAGATACGCCCTGGTT |
| T7Re-Luc  | taatacgcactactataggagaTAAAACCGGGAGGTAGATGAGA |

### Transfection and infection of Aag2 cells

For IP or transgenic PIWI protein analysis, Aag2 cells were transfected with PIWI protein expression plasmids using X-tremeGENE HP (Roche) according to the manufacturer's instructions. Three hours post transfection, the medium was refreshed with supplemented Leibovitz's medium and, where indicated, infected with SINV. For knockdown experiments, Aag2 were transfected with dsRNA using X-tremeGENE HP. To increase knockdown efficiency, Aag2 cells were re-transfected at 48h after the first transfection. Three hours post transfection the medium was refreshed with supplemented medium and, where indicated, cells were infected with SINV. Unless stated differently, samples were harvested at 48 hours post infection.

### Northern blot and $\beta$ -elimination

Small RNA northern blot was performed as described previously (2). Briefly, total RNA was isolated using Isol-RNA Lysis Reagent (5 PRIME), size separated on a 15% PAGE gel, blotted to a nylon membrane (Hybond NX; Amersham) and cross-linked using 1-ethyl-3-(3-dimethylaminopropyl) carbodiimide (EDC; Sigma). For NaIO<sub>4</sub> oxidation and  $\beta$ -elimination, total RNA (in 13.5 $\mu$ l water) was added to 4 $\mu$ l borate buffer (148mM borax, 148mM boric acid, pH 8.6) and 2.5 $\mu$ l 200mM NaIO<sub>4</sub>. After 10min incubation at room temperature, unreacted NaIO<sub>4</sub> was quenched by adding 2 $\mu$ l glycerol. After an additional 10min incubation at room temperature, samples were dried by centrifugation under vacuum and resuspended in 50 $\mu$ l of borax buffer (30mM borax, 30mM boric acid, 50mM NaOH, pH 9.5). Samples were incubated at 45°C for 1.5h. Finally, RNA was ethanol-precipitated and reconstituted in 15 $\mu$ l water for further northern blot analysis. Hybridization with [<sup>32</sup>P] labeled DNA oligonucleotides was performed overnight at 42°C. The membrane was washed in 0.1% SDS, 2x SSC, followed by two washing steps in 0.1% SDS, 1x SSC and 0.1% SDS, 0.1x SSC, respectively. All washes were performed at 42°C. For detection of the radioactive signal, the membrane was exposed to an X-ray film (Kodak). For northern blotting of high molecular weight RNA, total RNA was separated by denaturing agarose gel electrophoresis. The RNA was transferred to a nylon membrane using the turboblotter system (Whatman) according to the manufacturer's recommendations and crosslinked to the membrane using UV irradiation. Probe hybridization, washing of the membrane, and detection of the radioactive signal was carried out as described for the small RNA northern blot. Sequences of northern blot probes were:

|              |                                       |
|--------------|---------------------------------------|
| nSINV-7903+  | GGTTGCTTCTTCTTCTTCTCCTGCGTTT          |
| nSINV-7940+  | AGTGCCATGCGCTGTCTCTTTCCGGGTTTG        |
| nSINV-7969+  | TCGAACAATCTGTTCGGCCTCCAACCTAA         |
| nSINV-8040+  | GCAGAGGTTTCATTACCTTTCCTTCCAT          |
| nMir2940-3p  | AGTGATTTATCTCCCTGTGCGAC               |
| nTF345-1570+ | CTTGCTGGATTTCCGTCCTTTCGCTGATC         |
| nTF345-1630+ | AACGAAACGACGTTTGCTTTGGACACTGT         |
| nTF345-1058- | AGAAGCGCTATTCCACGCTCACCATCGCA         |
| nActin       | ATGGGCACGGTGTGGGAGACACCA              |
| nRPL5        | GCTTCTGCAGGATGCGGCGGGCAA              |
| nTRNA-lys    | AAAAGTCCAACGCTCTACCGACTGAGCTACCCGGGC  |
| nU3          | AAACTTGCCCTACAGAAATGATCCTGTGAAGCACAGT |

### qRT-PCR for AGO/PIWI proteins

Total RNA was DNaseI-treated (Ambion) and reverse-transcribed using the Taqman Reverse transcription kit (Roche) and random primers following the manufacturer's instructions. qPCR reactions were prepared using GoTaq qPCR SYBR Mastermix (Promega) and measured on a Light Cycler 480 (Roche). Expression of AGO/PIWI genes was internally normalized against the expression of Lysosomal Aspartic Protease (LAP) and the relative mRNA abundance was determined using the  $\Delta\Delta C_t$  method (3). The following primers were used for qPCR.

|             |                          |
|-------------|--------------------------|
| qFw-Piwi1/3 | GGCCGTTAGCGAGTCTCAT      |
| qRe-Piwi1/3 | GGCAGAACCTTCGTGGTAAG     |
| qFw-Piwi2   | CCGCGGGTACACCGCCGTCAACTT |
| qRe-Piwi2   | CGCTGGTCGAACTCGATGCCCCGC |
| qFw-Piwi4   | TCTTCTTCTCCACCACAGCC     |
| qRe-Piwi4   | ATGGTGACCACCTCACAGTTAC   |
| qFw-Piwi5   | ACGGCATCACATCGAGACTC     |
| qRe-Piwi5   | CGACCTCCACGCTGTCCTC      |
| qFw-Piwi6   | TTTTCTTCCACCCGAGCAG      |
| qRe-Piwi6   | AATACATTTGCGATGCGGCC     |
| qFw-Piwi7   | ATGCGACGAACTTCAACTTG     |
| qRe-Piwi7   | CCAGCAGCAACCGCATAATT     |
| qFw-Ago3    | CTCCAGACGACGGTTTTGGA     |
| qRe-Ago3    | GCAGGTACGAAATTGGCTGC     |
| qFw-Ago2    | ATTTGGCTCAAGATCAACGC     |
| qRe-Ago2    | GAGATCGTATGAAGCGGCCA     |
| qFw-Ago1    | CGAACAGCATGATGGAAGTG     |
| qRe-Ago1    | AAATTGTTTGCCTCGCATGT     |
| qFw-LAP     | GTGCTCATTCACCAACATCG     |
| qRe-LAP     | AACTTGGCCGCAACAAATAC     |

### Immunoprecipitation

Aag2 cells expressing V5-3xFlag-tagged PIWI proteins were lysed in lysis buffer (50mM Tris-HCl (pH7.8), 150mM NaCl, 1mM EDTA, 1mM DTT, 0.5% NP40, 1x Protease inhibitors). The lysates were cleared by incubation with washed Protein G agarose beads (Thermo Scientific) at 4°C under constant rotation for 6 hours. For V5-IP, the cleared lysates were incubated with washed V5 agarose beads (Sigma) overnight under the same conditions. The beads were then washed 5 times in wash buffer I (50mM Tris-HCl (pH7.8), 150mM NaCl, 1mM EDTA), followed by two wash steps in wash buffer II (25mM Tris-HCl (pH7.8) 150mM). Finally, the bound RNA was isolated from the beads using Isol-RNA Lysis Reagent.

### Immunofluorescence and western blot analyses

For subcellular localization of PIWI proteins, uninfected or SINV-infected Aag2 cells expressing 3xHA-tagged Piwi5 or Ago3 were fixed on coverslips using 4% paraformaldehyde. Cells were permeabilized in PBS/0.1% Triton and incubated with rabbit anti-HA (1:200 dilution; Abcam ab 9110), or mouse anti-dsRNA (1:1000 dilution; English & Scientific consulting J2 mAb) antibodies. Subsequently, cells were washed in PBS/0.1% Triton and incubated with secondary antibodies (1:400 dilution, goat anti mouse-AlexaFluor594, or goat anti rabbit-AlexaFluor488; Life technologies). After

washing, the nuclei were stained with Hoechst reagent and cover slips were fixed to microscope slides using Mowiol. Pictures were taken on an Olympus FV1000 confocal microscope.

For western blot, proteins were size separated on SDS-PAGE gels and transferred to a nitrocellulose membrane. Antibodies used to detect the proteins were: mouse anti-Flag M2 (1:1000 dilution, Sigma), rat anti-tubulin alpha (1:1000 dilution, Sanbio), and mouse anti-H3K9me2 (1:1000 dilution, Abcam ab1220). Secondary antibodies were IRdye680 or IRdye800 conjugated goat anti mouse or goat anti rat, respectively (both 1:15000 dilution; Li-cor).

### 5' RACE and Piwi5 RT-PCR

5'RACE for Piwi5 was performed using the First Choice RNA Ligase Mediated RACE kit (Ambion) according to the manufacturer's instructions. Briefly, total RNA was treated with Calf Intestine Alkaline Phosphatase (CIP) to remove free 5' phosphate groups and Tobacco Acid Pyrophosphatase (TAP) to remove the cap of mRNAs. The RNA was then ligated to the 5'RACE RNA adapter, reverse transcribed and PCR amplified. The PCR product was sequenced by Sanger technology. Piwi5 RT-PCR was performed on Aag2 cDNA using Thermopfect DNA Polymerase. The following primers were used:

|            |                                   |
|------------|-----------------------------------|
| pFw-Piwi5A | ACGGCATCACATCGAGACTC (=qFw-Piwi5) |
| pFw-Piwi5B | CAGCAACCGCAACAGCCAGCGCCT          |
| pRe-Piwi5C | GTGCTTCTCCGCCAGTGGCACCCC          |
| pRe-Piwi5D | AAATGCTCCAAGCGCTGTAT              |

### SUPPLEMENTARY REFERENCES

1. Vodovar, N., Bronkhorst, A.W., van Cleef, K.W., Miesen, P., Blanc, H., van Rij, R.P. and Saleh, M.C. (2012) Arbovirus-derived piRNAs exhibit a ping-pong signature in mosquito cells. *PloS one*, **7**, e30861.
2. Pall, G.S. and Hamilton, A.J. (2008) Improved northern blot method for enhanced detection of small RNA. *Nature protocols*, **3**, 1077-1084.
3. Livak, K.J. and Schmittgen, T.D. (2001) Analysis of relative gene expression data using real-time quantitative PCR and the 2(-Delta Delta C(T)) Method. *Methods*, **25**, 402-408.
